# Supplementary material for: A critical factor in reactive oxygen species (ROS) studies: the need to understand the chemistry of the solvent used: the case of DMSO
Source: Royal Society of Chemistry journal article supplement (doi:10.1039/d4sc05038j), 2024-01-01
Supplement: d4sc05038j1.pdf [file d4sc05038j1.pdf]

Supplementary Information

**A Critical Factor in Reactive Oxygen Species (ROS) Studies: The Need to Understand the Chemistry of the Solvent Used: The Case of DMSO**

Shubham Bansal and Binghe Wang\*

Department of Chemistry and Center for Diagnostics and Therapeutics, Georgia State University, Atlanta, Georgia 30301 USA

\*Address correspondence to

Dr. Binghe Wang

Regents Professor and Dr. Frank Hannah Chair

Georgia Research Alliance Eminent Scholar

Department of Chemistry

Georgia State University

Atlanta, Georgia 30301

USA

[wang@gsu.edu](mailto:wang@gsu.edu)

Phone: 404-413-5544

## 1. Experimental section

### 1.1. Materials and Methods

All reagents and solvents were of reagent grade from Sigma-Aldrich (Massachusetts, USA) or Oakwood Products, Inc. (South Carolina, USA). 2',7'-Dichlorodihydrofluorescein diacetate, DCFH-DA (CAS 4091-99-0 and Catalog No. HA-7023) was purchased from Combi-Blocks (California, USA). 2,7-Dichlorodihydrofluorescein, DCFH (Synonym: DCFH2, CAS 106070-31-9, and Catalog No. HY-153006) was purchased from MedChemExpress (New Jersey, USA). PMA (CAS 16561-29-8 and Catalog No. HY-18739) was purchased from MedChemExpress (New Jersey, USA). RAW264.7 cells were purchased from ATCC (Virginia, USA). <sup>1</sup>H NMR (400 MHz) spectra were recorded on a Bruker Avance 400 MHz NMR spectrometer in deuterated solvent from Oakwood Products, Inc. (South Carolina, USA). Chemical shifts were reported as  $\delta$  values (ppm). TMS ( $\delta = 0.00$  ppm) or residual peaks of the deuterated solvent were used as the internal reference. Samples of milligram-quantities were weighed on C-33 microbalance (CAHN instruments Inc., California, USA). Plate reader: excitation wavelength 495 nm, emission wavelength 535 nm.

### 1.2. NMR studies

Firstly, 100-mM stock solutions of DMSO or DMF were prepared in D<sub>2</sub>O. For 100-mM DMSO stock solution, 7.1  $\mu$ L of DMSO was added to 992.9  $\mu$ L of D<sub>2</sub>O. For the 100-mM DMF stock solution, 7.75  $\mu$ L of DMF was added to 992.25  $\mu$ L of D<sub>2</sub>O. Commercial NaOCl was used directly without purification (1.811 M). 100 mM of NaOCl was prepared by adding 55  $\mu$ L of NaOCl (from 1.811 M) to 945  $\mu$ L of H<sub>2</sub>O. After that 100  $\mu$ L of NaOCl (from 100 mM) to 900  $\mu$ L of H<sub>2</sub>O which gave a 10 mM working solution.

For reaction mixtures having 3 eq. of NaOCl and 1 eq. of DMSO or DMF: 50  $\mu$ L (from 100-mM stock solution) of DMSO/DMF solution was added to 441.8  $\mu$ L of D<sub>2</sub>O followed by the addition the solution 8.2  $\mu$ L of NaOCl (from 1.811 M). The resulting mixture was incubated at 37 °C for 30 min before acquisition of NMR spectra. Solutions of 10-mM of DMSO or DMF were prepared by adding 50  $\mu$ L (from 100 mM stock) to 450  $\mu$ L of D<sub>2</sub>O.

For reaction mixtures having 1 mM of DMSO or DMF and limiting amount of NaOCl:

- a) 1 mM DMSO and 100  $\mu$ M of NaOCl: 5  $\mu$ L of 100-mM stock solution of DMSO was added to 490  $\mu$ L of D<sub>2</sub>O followed by the addition of 5  $\mu$ L of a 10-mM NaOCl solution. The resulting mixture was incubated at 37 °C for 30 minutes before NMR acquisition.
- b) 1 mM DMSO and 200  $\mu$ M of NaOCl: 5  $\mu$ L of 100-mM stock solution of DMSO was added to 485  $\mu$ L of D<sub>2</sub>O followed by the addition of 10  $\mu$ L of a 10-mM NaOCl solution. The resulting mixture was incubated at 37 °C for 30 minutes before NMR acquisition.
- c) 1 mM DMSO and 400  $\mu$ M of NaOCl: 5  $\mu$ L of 100-mM stock solution of DMSO was added to 475  $\mu$ L of D<sub>2</sub>O followed by the addition of 20  $\mu$ L of a 10-mM NaOCl was added. The resulting mixture was incubated at 37 °C for 30 min minutes before NMR acquisition.

### **1.3. Effect of DMSO on the reaction of fluorescent Probe with ROS**

#### **1.3.1. Effect of 1% DMSO or DMF on the reactivity of the probe**

Stock solutions were prepared as

- a) 10 mM DCFH in DMSO, 1.544 mg of DCFH was dissolved in 382.9  $\mu$ L of DMSO. Then 1 mM working solution was prepared by adding 100  $\mu$ L of DCFH (10 mM in DMSO) to 900  $\mu$ L of DMSO.
- b) 10 mM DCFH in DMF, 1.649 mg of DCFH was dissolved in 408.9  $\mu$ L of DMF. Then 1 mM working solution was prepared by adding 100  $\mu$ L of DCFH (10 mM in DMF) to 900  $\mu$ L of DMF.
- c) 10 mM NaOCl stock solution: First, a 100 mM of NaOCl was prepared by adding 55  $\mu$ L of NaOCl (from 1.811 M) to 945  $\mu$ L of H<sub>2</sub>O. After that 100  $\mu$ L of NaOCl (from 100 mM) to 900  $\mu$ L of H<sub>2</sub>O which gave a 10 mM working solution.
- d) 10 mM H<sub>2</sub>O<sub>2</sub> stock solution: First, a 100 mM of H<sub>2</sub>O<sub>2</sub> was prepared by adding 9.09  $\mu$ L of H<sub>2</sub>O<sub>2</sub> (from 11 M) to 991  $\mu$ L of H<sub>2</sub>O. After that 100  $\mu$ L of H<sub>2</sub>O<sub>2</sub> (from 100 mM) to 900  $\mu$ L of H<sub>2</sub>O which gave a 10 mM working solution.

Sample Preparation

- a) 10  $\mu$ M DCFH and 100  $\mu$ M NaOCl in 1% DMF in PBS: Firstly, 15  $\mu$ L of DCFH (from 1 mM stock solution in DMF) was added to 1.470 mL of PBS at pH 7.4, followed by the addition of 15  $\mu$ L of NaOCl (10 mM). Then the fluorescence spectrum was recorded.

- b) 10  $\mu\text{M}$  DCFH and 100  $\mu\text{M}$  NaOCl in 1% DMSO in PBS: Firstly, 15  $\mu\text{L}$  of DCFH (from 1 mM stock solution in DMSO) was added to 1.470 mL of PBS at pH 7.4 followed by the addition of 15  $\mu\text{L}$  of NaOCl (10 mM). Then the fluorescence spectrum was recorded.
- c) 10  $\mu\text{M}$  DCFH and 100  $\mu\text{M}$   $\text{H}_2\text{O}_2$  in 1% DMF in PBS: Firstly, 15  $\mu\text{L}$  of DCFH (from 1 mM stock solution in DMF) was added to 1.470 mL of PBS at pH 7.4 followed by the addition of 15  $\mu\text{L}$  of  $\text{H}_2\text{O}_2$  (10 mM). Then the fluorescence spectrum was recorded.

### **1.3.2. Concentration-dependent effects of DMSO on the reactivity of the fluorescent probe**

Stock solutions were prepared as

- a) 1.2 M solution of DMSO was prepared by adding 172  $\mu\text{L}$  of pure DMSO to 1828  $\mu\text{L}$  of PBS at pH 7.4.
- b) 1.2 M solution of DMF was prepared by adding 186  $\mu\text{L}$  of pure DMF to 1814  $\mu\text{L}$  of PBS at pH 7.4.
- c) 30  $\mu\text{M}$  DCFH in PBS was prepared by adding 30  $\mu\text{L}$  of DCFH (10 mM in DMF) to 9.970 mL of PBS at pH 7.4.
- d) 30  $\mu\text{M}$  DCFH in PBS was prepared by adding 30  $\mu\text{L}$  of DCFH (10 mM in DMSO) to 9.970 mL of PBS at pH 7.4.
- e) 300  $\mu\text{M}$  NaOCl in PBS was prepared by adding 30  $\mu\text{L}$  of NaOCl (100 mM in  $\text{H}_2\text{O}$ ) to 9.970 mL of PBS at pH 7.4.

Sample preparation: To conduct this set of experiments, 96-well plate ( $8 \times 12$ ) were used. Firstly, 200  $\mu\text{L}$  of 1.2 M DMF or DMSO was added to the wells in Column 1 and the rest of wells were filled with 100  $\mu\text{L}$  of PBS. Then serial dilution was conducted by starting with transferring 100  $\mu\text{L}$  from each well of Column 1 to the next column. Subsequent dilutions were conducted the same way. For the last column, 100  $\mu\text{L}$  of the final solution was removed and discarded. Then 100  $\mu\text{L}$  of DCFH and 100  $\mu\text{L}$  of NaOCl were added to each well, resulting in a total volume of 300  $\mu\text{L}$  in each well and DMF/DMSO concentrations of 400 mM, 200 mM, 100 mM, 50 mM, 25 mM, 12.5 mM, 6.25 mM, 3.13 mM, 1.56 mM, 0.78 mM, 0.39 mM, and 0.20 mM. Subsequently, the plate was incubated at 37  $^\circ\text{C}$  for 30 min before fluorescence measurements using a plate reader. All experiments were conducted in triplicates.

#### 1.4. Stability of DCFH-DA in cell culture media and PBS

Stock solutions were prepared as

- a) 2 mM DCFH-DA in DMF: Firstly 5 mM of DCFH-DA in DMF was prepared by dissolving 1.160 mg in 476.1  $\mu\text{L}$  of DMF. Then 200  $\mu\text{L}$  of DCFH-DA (from 5 mM) was added to 800  $\mu\text{L}$  of DMF to give a 2 mM DCFH-DA solution.
- b) 100 mM and 10 mM of NaOCl solutions: First, a 100 mM of NaOCl was prepared by adding 55  $\mu\text{L}$  of NaOCl (from 1.811 M) to 945  $\mu\text{L}$  of  $\text{H}_2\text{O}$ . Then adding 100  $\mu\text{L}$  of the NaOCl stock solution (100 mM) to 900  $\mu\text{L}$  of  $\text{H}_2\text{O}$  which gave a 10 mM solution.

To monitor the stability of DCFH-DA

- a) 20  $\mu\text{M}$  of DCFH-DA in Fluorobrite DMEM: 15  $\mu\text{L}$  of DCFH-DA (from 2 mM) was added to 1485  $\mu\text{L}$  of Fluorobrite DMEM. The resulting mixture was incubated at 37  $^\circ\text{C}$ . At designated time points, the fluorescence spectra were recorded.

As reference, two new solutions containing NaOCl were prepared:

- a. 20  $\mu\text{M}$  of DCFH and 100  $\mu\text{M}$  of NaOCl in Fluorobrite DMEM: 15  $\mu\text{L}$  of DCFH (from 2 mM) was added to 1470  $\mu\text{L}$  of Fluorobrite DMEM followed by the addition of 15  $\mu\text{L}$  of NaOCl (from 10 mM). The fluorescence spectrum of the resulting solution was recorded.
  - b. 20  $\mu\text{M}$  of DCFH and 200  $\mu\text{M}$  of NaOCl in Fluorobrite DMEM: 15  $\mu\text{L}$  of DCFH (from 2 mM) was added to 1455  $\mu\text{L}$  of Fluorobrite DMEM followed by the addition of 30  $\mu\text{L}$  of NaOCl (from 10 mM). The fluorescence spectrum of the resulting solution was recorded.
  - c. 20  $\mu\text{M}$  of DCFH and 2 mM of NaOCl in Fluorobrite DMEM: 15  $\mu\text{L}$  of DCFH (from 2 mM) was added to 1455  $\mu\text{L}$  of Fluorobrite DMEM followed by the addition of 30  $\mu\text{L}$  of NaOCl (from 100 mM). The fluorescence spectrum of the resulting solution was recorded.
- b) 20  $\mu\text{M}$  of DCFH-DA in PBS: 15  $\mu\text{L}$  of DCFH-DA (from 2 mM) was added to 1485  $\mu\text{L}$  of PBS. The resulting mixture was incubated at 37  $^\circ\text{C}$ . At designated time points, the fluorescence spectrum was recorded.

As reference, two solutions containing NaOCl was prepared:

- a. 20  $\mu\text{M}$  of DCFH and 100  $\mu\text{M}$  of NaOCl in PBS: 15  $\mu\text{L}$  of DCFH (from 2 mM) was added to 1470  $\mu\text{L}$  of PBS followed by the addition of 15  $\mu\text{L}$  of NaOCl (from 10 mM). The fluorescence spectrum of the resulting solution was recorded.
- b. 20  $\mu\text{M}$  of DCFH and 200  $\mu\text{M}$  of NaOCl in PBS: 15  $\mu\text{L}$  of DCFH (from 2 mM) was added to 1455  $\mu\text{L}$  of PBS followed by the addition of 30  $\mu\text{L}$  of NaOCl (from 10 mM). The fluorescence spectrum of the resulting solution was recorded.

## 1.5. Cell studies

### 1.5.1. ROS production in RAW264.7 at different concentrations of DMSO

Firstly, stock solutions were prepared in DMSO.

- a) 5 mM of DCFH-DA in DMSO was prepared by dissolving 0.931 mg in 382.1  $\mu\text{L}$  of DMSO.
- b) 1 mM of PMA in DMSO was prepared by dissolving 0.458 mg in 742.5  $\mu\text{L}$  of DMSO.
- c) 20  $\mu\text{M}$  of DCFH-DA was prepared by adding 20  $\mu\text{L}$  of 5 mM DCFH-DA to 4.980 mL of DMEM.
- d) 20  $\mu\text{M}$  DCFH-DA with 2  $\mu\text{M}$  PMA was prepared by adding 20  $\mu\text{L}$  of 5 mM DCFH-DA and 10  $\mu\text{L}$  of 1 mM PMA in 4.970 mL of DMEM.

To conduct this set of experiments, two 96-well plate ( $8 \times 12$ ) were used. The first plate was used to prepare DCFH-DA with and without PMA having various concentrations of DMSO. Firstly, 180  $\mu\text{L}$  of media and 20  $\mu\text{L}$  of DMF or DMSO was added to the wells in Column 1 and the rest of wells were filled with 100  $\mu\text{L}$  of PBS. Then serial dilution was conducted by starting with transferring 100  $\mu\text{L}$  from each well of Column 1 to the next column. Subsequent dilutions were conducted the same way. For the last column, 100  $\mu\text{L}$  of the final solution was removed and discarded. Then 100  $\mu\text{L}$  of DCFH-DA (20  $\mu\text{M}$ ) with and without PMA (2  $\mu\text{M}$ ) was added to the designated wells. Subsequently, a second plate 96-well plate having RAW264.7 cells was prepared to have over 80% confluency. From the cell containing plate media was removed and 120  $\mu\text{L}$  from each well of first plate was transferred to the plate containing RAW264.7 cells. The RAW264.7 cells were finally incubated having 10  $\mu\text{M}$  DCFH-DA with and without 1  $\mu\text{M}$  PMA and the DMSO concentrations of 700 mM, 350 mM, 175 mM, 87.5 mM, 43.75 mM, 21.8 mM, 10.9 mM, 5.4 mM,

2.7 mM, 1.3 mM, 0.6 mM, and 0.30 mM. Subsequently, the plate was incubated 2 h before fluorescence measurements using a plate reader. All experiments were conducted in triplicates.

### **1.5.2. DMSO's reaction with ROS in cell lysate system**

Stock solutions were prepared as

- a) 1.2 M solution of DMSO was prepared by adding 172  $\mu\text{L}$  of pure DMSO to 1828  $\mu\text{L}$  of PBS at pH 7.4.
- b) 1.2 M solution of DMF was prepared by adding 186  $\mu\text{L}$  of pure DMSO to 1814  $\mu\text{L}$  of PBS at pH 7.4.
- c) 80  $\mu\text{M}$  DCFH in PBS was prepared by adding 160  $\mu\text{L}$  of DCFH (10 mM in DMF) to 19.840 mL of PBS at pH 7.4.
- d) 80  $\mu\text{M}$  DCFH in PBS was prepared by adding 160  $\mu\text{L}$  of DCFH (10 mM in DMSO) to 19.840 mL of PBS at pH 7.4.
- e) 8 mM NaOCl in PBS was prepared by adding 88  $\mu\text{L}$  of NaOCl (1.811 mM) to 19.912 mL of PBS at pH 7.4.

Cell lysate preparation: RAW264.7 cells were used to prepare cell lysate. 2 mL of  $2.3 \times 10^7$  cells/mL RAW264.7 cells were centrifuged to prepare cell pallet. After centrifuge, the supernatant was discarded, and the cells were washed by PBS (2 $\times$ 2 mL). After removing the PBS, two mL of RIPA buffer was added to the cell pallet to prepare cell lysate. Then, 0.5 mL of this cell lysate was added to 11.5 mL of PBS which was then used in the experiment.

To conduct this set of experiments, 96-well plate (8  $\times$  12) were used. Firstly, 200  $\mu\text{L}$  of 1.2 M DMF or DMSO was added to the wells in Column 1 and the rest of wells were filled with 100  $\mu\text{L}$  of PBS. Then serial dilution was conducted by starting with transferring 100  $\mu\text{L}$  from each well of Column 1 to the next column. Subsequent dilutions were conducted the same way. For the last column, 100  $\mu\text{L}$  of the final solution was removed and discarded. Then 25  $\mu\text{L}$  of (80  $\mu\text{M}$ ) DCFH. Then, 50  $\mu\text{L}$  of cell lysate was added to each well. Finally, 25  $\mu\text{L}$  of 8 mM NaOCl was added to each well. Each well had 10  $\mu\text{M}$  of DCFH and 1 mM of NaOCl. Each well resulting in a total volume of 200  $\mu\text{L}$  and DMF/DMSO concentrations of 600 mM, 300 mM, 150 mM, 75 mM, 37.5 mM, 18.75 mM, 9.38 mM, 4.69 mM, 2.34 mM, 1.17 mM, 0.59 mM, and 0.29 mM. Subsequently,

the plate was incubated at 37 °C for 30 min before fluorescence measurements using a plate reader. All experiments were conducted in triplicates.
